# Supplementary material
Source: PubMed Central journal article supplement (PMC4136207)
Supplement: IAI.01065-13_zii999090804so1.pdf [file IAI.01065-13_zii999090804so1.pdf]

Supplementary figure

Fig.1

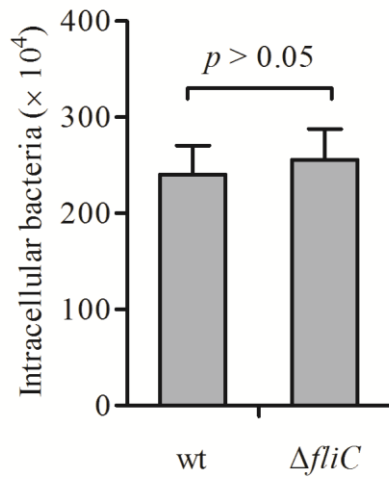

Fig.1 Comparing the infection efficiency of wt and  $\Delta fliC$  by counting intracellular bacteria at 1 h post infection from infected mandarin fish primary macrophages.

Fig.2A

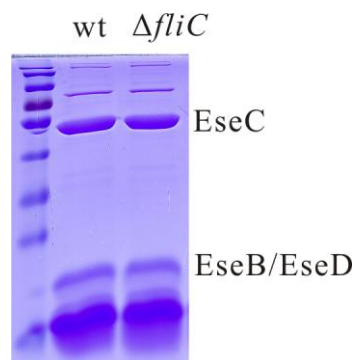

**Fig.2A** Secretion profiles of *E. tarda* strains. Samples of ECPs from the same amount of bacteria grown in DMEM were separated on SDS-PAGE and stained with Coomassie blue. T3SS proteins EseC, EseB, and EseD were labeled.

Fig.2B

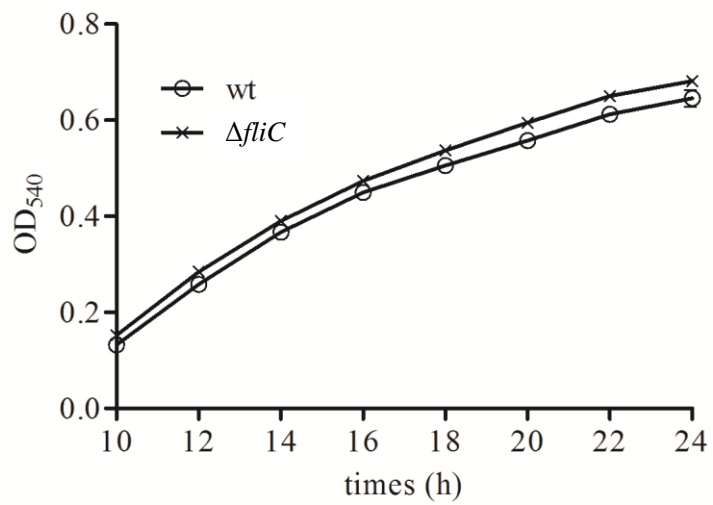

**Fig.2B** Growth curves of *E. tarda* wild-type (○) and  $\Delta fliC$  (×). Bacterial cultures were subcultured at 1:200 into DMEM, and OD<sub>540</sub> were measured at different time post subculture. Error bars indicate the SD values from three replicative growth.
